# Supplementary material
Source: ML conference proceedings conference paper supplement (https://proceedings.mlr.press/v115/van-der-zander20a.html)
Supplement: Supplementary file [file van-der-zander20a-supp.pdf]

## A Supplementary Material

Here we present the missing proofs for the lemmas in “Finding minimal  $d$ -separators in linear time and applications”.

*Proof of Lemma 4.1.* Every collider  $C \in pAn(\mathbf{X} \cup \mathbf{Y} \cup \mathbf{Z})$  can be replaced by a possible directed path  $\pi_C$  from  $C$  to a node  $V \in \mathbf{X} \cup \mathbf{Y} \cup \mathbf{Z}$  and its reverse from  $V$  to  $C$ .  $\pi_C$  contains no node of  $\mathbf{X} \cup \mathbf{Y} \cup \mathbf{Z}$  besides  $V$ . We can assume  $\pi_C$  does not contain any undirected edge, since there is an edge pointing towards the collider  $C$ . In an AG the configuration  $B \rightarrow C - D$  is forbidden. In an RCG  $B \rightarrow C - D$  can only occur, if there is an edge  $B \rightarrow D$ , so all undirected edges can be removed from  $\pi_C$ .

After every collider  $C$  has been replaced by  $\pi_C$ , the walk is of almost definite status, since only directed edges pointing away from it are added. After truncating the walk to start at its last node in  $\mathbf{X}$  and end at the next node in  $\mathbf{Y}$ , all colliders are in  $\mathbf{Z}$ .  $\square$

*Proof Lemma 4.2.* For paths in AGs this is Lemma 3.13 in [18]. For RCGs let  $\pi$  be a walk with a node  $V \notin pAn(\mathbf{X} \cup \mathbf{Y} \cup \mathbf{Z})$ . Assume  $V$  is the first such node and  $U$  the preceding node. Node  $V$  is not a possible ancestor of  $U$ , so they are connected by an edge  $U \rightarrow V$ .

All later edges on  $\pi$  point away from  $U$ : There is no undirected edge like  $U \rightarrow V -$  since  $\pi$  is of almost definite status. There is no collider like  $U \rightarrow V \leftarrow$ , since  $V$  is not an (possible) ancestor of  $\mathbf{Z}$ .

Hence  $\pi$  ends with  $U \rightarrow V \rightarrow \dots \rightarrow Y$  and  $V$  is an ancestor of  $Y$ .  $\square$

*Proof of Lemma 4.4.* If there is an  $Z \in \mathbf{Z} \setminus \mathbf{I}$  such that  $\mathbf{Z} \setminus Z$  is a separator,  $\mathbf{Z}$  is clearly not minimal. In the other direction, we have  $\mathbf{Z} \setminus Z$  is not a separator for every  $Z \in \mathbf{Z} \setminus \mathbf{I}$ , so for each  $Z \in \mathbf{Z} \setminus \mathbf{I}$  there is a definite status path  $\pi_Z : \mathbf{X} \rightsquigarrow \mathbf{Y}$  that is not blocked by  $\mathbf{Z} \setminus Z$ , i.e., every non-collider is not in  $\mathbf{Z} \setminus Z$  and every collider is in  $An(\mathbf{Z} \setminus Z)$ . Assume  $\mathbf{Z}$  is not minimal, so there is a separator  $\mathbf{Z}' \subset \mathbf{Z}$  with  $\mathbf{I} \subseteq \mathbf{Z}'$ .

Let  $Z \in \mathbf{Z} \setminus \mathbf{Z}'$ . No non-collider of  $\pi_Z$  is in  $\mathbf{Z}' \subseteq \mathbf{Z} \setminus Z$  and every collider is in  $An(\mathbf{Z} \setminus Z) \subseteq pAn(\mathbf{X} \cup \mathbf{Y} \cup (\mathbf{Z} \setminus Z)) = pAn(\mathbf{X} \cup \mathbf{Y} \cup \mathbf{I}) = pAn(\mathbf{X} \cup \mathbf{Y} \cup \mathbf{Z}')$ , so  $\mathbf{Z}'$  is not a separator due to Lemma 4.1. Hence  $\mathbf{Z}$  is minimal.  $\square$

*Proof of Proposition 6.5.*  $\mathbf{Z}_2 \subseteq \mathbf{Z}$  is a valid adjustment set, since it is a separator in  $\mathcal{G}_{\mathbf{X}\mathbf{Y}}^{pbd}$  and as subset of  $\mathbf{Z}$  contains no forbidden nodes of  $De(PCP(\mathbf{X}, \mathbf{Y}))$ .

Let  $\pi$  be a path between  $Z_1 \in \mathbf{Z}_1 \setminus \mathbf{Z}_2$  and  $Y$  not blocked by  $\mathbf{Z}_2 \cup X$  in  $\mathcal{G}$ .  $\pi$  also exists as unblocked path in  $\mathcal{G}_{\mathbf{X}\mathbf{Y}}^{pbd}$ , because it contains no edge  $X \rightarrow$  and no edge on a path to a collider opening node in  $\mathbf{Z}$  is removed in  $\mathcal{G}_{\mathbf{X}\mathbf{Y}}^{pbd}$  (otherwise that node would be a descendant of  $PCP(\mathbf{X}, \mathbf{Y})$  and thus be a forbidden node). Since  $\mathbf{Z}_1 \subseteq \mathbf{Z} \subseteq An(\mathbf{X} \cup \mathbf{Y} \cup \mathbf{I})$ ,  $\pi$  only contains nodes of  $An(\mathbf{X} \cup \mathbf{Y} \cup \mathbf{I})$  in  $\mathcal{G}$  and  $\mathcal{G}_{\mathbf{X}\mathbf{Y}}^{pbd}$ . Let  $N \in \mathbf{Z}$  be the last non-collider on  $\pi$  in  $\mathbf{Z}$ . If no such  $N$  exists,  $Z_1$  is reachable from  $Y$  and  $Z_1 \in \mathbf{Z}_2$ , so  $\pi$  does not exist.  $N$  is reachable from  $Y$ , so  $N \in \mathbf{Z}_2$  and  $\pi$  is blocked at  $N$  by  $\mathbf{Z}_2$ .

Let  $\pi$  be the shortest path between  $\mathbf{X}$  and  $Z_2 \in \mathbf{Z}_2 \setminus \mathbf{Z}_1$  not blocked by  $\mathbf{Z}_1$  in  $\mathcal{G}$ . Again  $\pi$  only contains nodes of  $An(\mathbf{X} \cup \mathbf{Y} \cup \mathbf{I})$ .  $\pi$  exists as unblocked path in  $\mathcal{G}_{\mathbf{X}\mathbf{Y}}^{pbd}$ , because if it would contain an edge  $X \rightarrow$  the node  $Z_2$  or a collider opening node in  $\mathbf{Z}_1$  would be a forbidden node  $De(PCP(\mathbf{X}, \mathbf{Y}))$ . There is a path  $\pi_Y$  from  $Z_2$  to  $Y$  in  $\mathcal{G}_{\mathbf{X}\mathbf{Y}}^{pbd}$  that contains no non-collider in  $\mathbf{Z}$ , or  $\mathbf{Z}_2$  would not contain  $Z_2$ , so  $\mathbf{Z}_1$  does not block  $\pi_Y$ . So unless  $Z_2$  is a collider on the walk  $\pi\pi_Y$ ,  $\pi\pi_Y$  is not blocked by  $\mathbf{Z}_1$  in  $\mathcal{G}_{\mathbf{X}\mathbf{Y}}^{pbd}$ , so  $\mathbf{Z}_1$  is not a valid adjustment set. If  $Z_2$  is a collider, either  $\pi\pi_Y$  is not blocked by  $\mathbf{Z}_2$  or a non-collider  $Z_2'$  of  $\pi$  is in  $\mathbf{Z}_2$ . Then  $\pi[\mathbf{X} \rightsquigarrow Z_2']$  is shorter than  $\pi$ .

Thus, from Lemma 6.4 it follows that  $\mathbf{Z}_2$  ensures a lower or equal asymptotic variance than  $\mathbf{Z}_1$ .  $\square$

*Proof of Proposition 6.7.* With the call to REACHABLE algorithm FINDNEARESTSEP computes a set  $\mathbf{Z}'' \subseteq \mathbf{A} = An(Y \cup Z)$  in a DAG on which every node  $W \in \mathbf{Z}''$  is reachable from  $Y$  by a walk only containing nodes in  $\mathbf{A}$  and every non-collider is not in  $\mathbf{Z}' = \mathbf{R} \cap (\mathbf{A} \setminus (Y \cup Z))$ .  $Y$  and  $Z$  can only occur as end-nodes on the walk, so for every  $W \in \mathbf{Z}''$  there exists a walk  $\pi_W$  that is active given  $\mathbf{Z}'' \setminus W$  and contains no observable non-collider. Let  $\mathbf{W}$  be the final set returned by FINDNEARESTSEP( $\mathcal{G}, Y, Z, \emptyset, \mathbf{R}$ ).

If  $\mathbf{W}$  is not a nearest separator, there is a  $X \in An(Y \cup Z) \setminus \{Y, Z\}$ , a path  $\pi^m$  between  $X$  and  $Z$  intersecting  $\mathbf{W}$ , and another  $d$ -separator  $\mathbf{W}' \subseteq \mathbf{R} \setminus \{Y, Z\}$  separating  $Y$  and  $Z$  that does not contain a node of  $\pi^m$ .  $\mathbf{W}'$  also does not contain  $X$ , the start node of  $\pi^m$ . We can assume  $X \in \mathbf{W}$  w.l.o.g. since  $\pi^m$  intersects  $\mathbf{W}$ . The path  $\pi^m$  in the moral graph can skip colliders, let  $\pi$  be the corresponding path in the DAG that includes the skipped colliders in  $An(Y \cup Z)$ .

Without an observable non-collider on  $\pi_X$ , the combined walk  $\pi_X\pi : Y \rightsquigarrow Z$  contains no node of  $\mathbf{W}'$  as non-collider. All colliders are in  $An(Y \cup Z)$ , so due to Lemma 4.1  $\pi_X\pi$  is active given  $\mathbf{W}'$  and  $\mathbf{W}'$  is not a  $d$ -separator.  $\square$
